# Supplementary material for: A retrospective, multicentric, nationwide analysis of the impact of splenectomy on survival of pancreatic cancer patients
Source: PubMed Central journal article supplement (PMC11663811; doi:10.1007/s00423-024-03570-y), 2024-12-22
Supplement: 423_2024_3570_MOESM1_ESM.pdf [file 423_2024_3570_MOESM1_ESM.pdf]

# Supplementary Material

## Supplementary Figure 1

A - Total and Distal Pankreatectomy

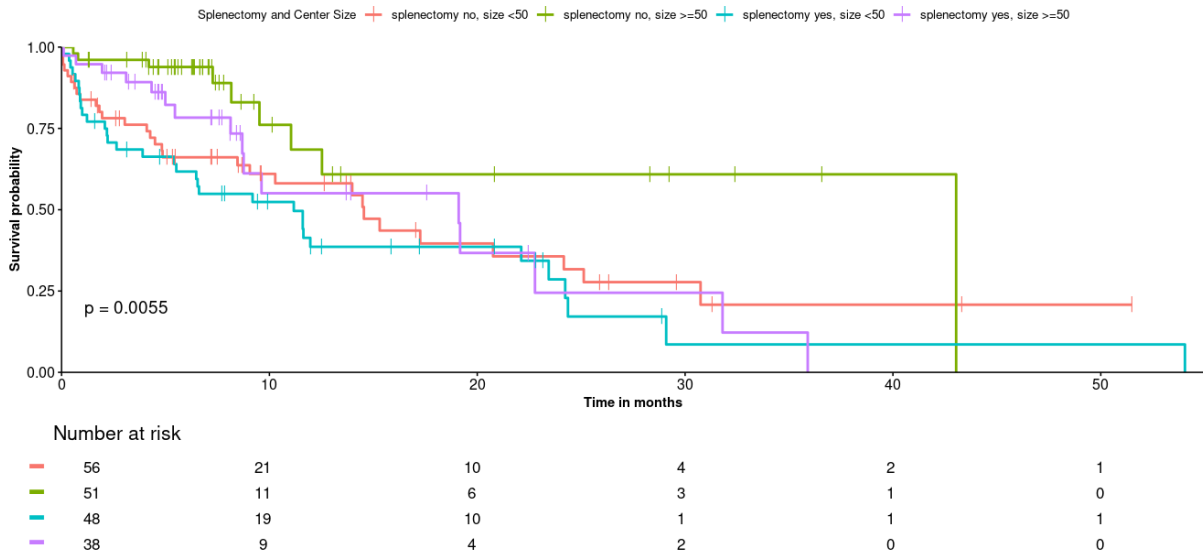

Survival analysis of splenectomy in combination with center size. The Kaplan-Meier curves illustrate, that patients have the best prognosis in high volume centers ( $\geq 50$  cases/year). However, for both center volumes, spleen preservation remains an independent factor for a better outcome of the patient.

## Supplementary Figure 2

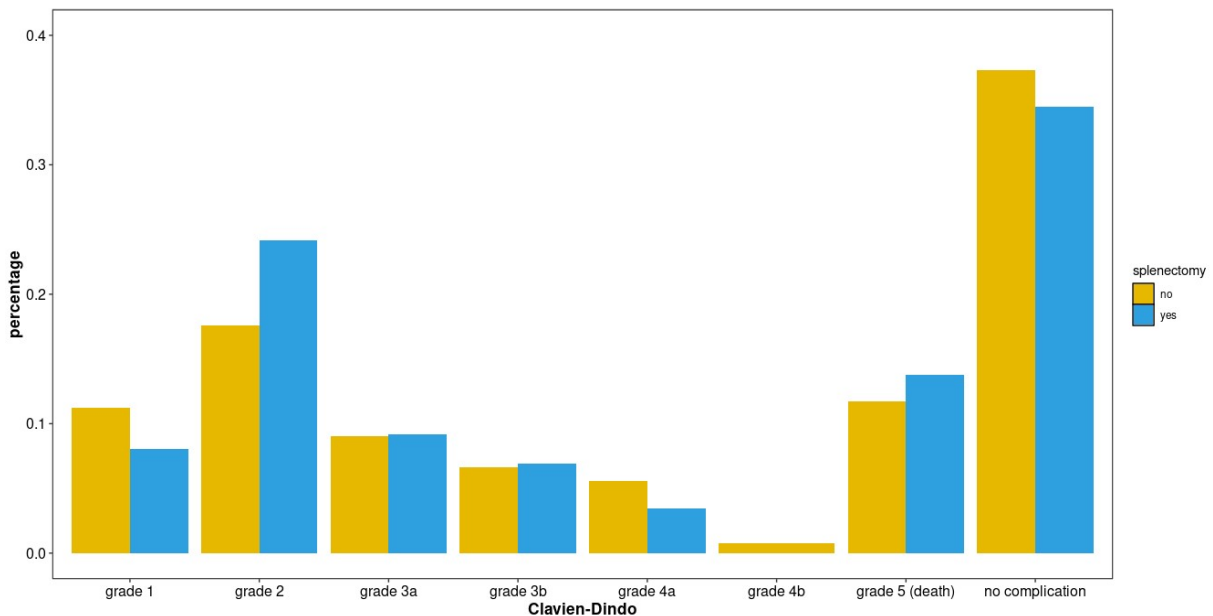

Comparison of **postoperative** morbidity and mortality based on Clavien Dindo Classification in the splenectomy and spleen-preserving group. No significant differences could be found **between** the two groups.
